# Supplementary figures and images for: Automatic integrated system for catalytic spectrophotometric determination of vanadium in water samples
Source: Royal Society of Chemistry journal article supplement (doi:10.1039/c4ay01887g), 2014-01-01

1 **Supplementary material**

2 **Figure S1**

3

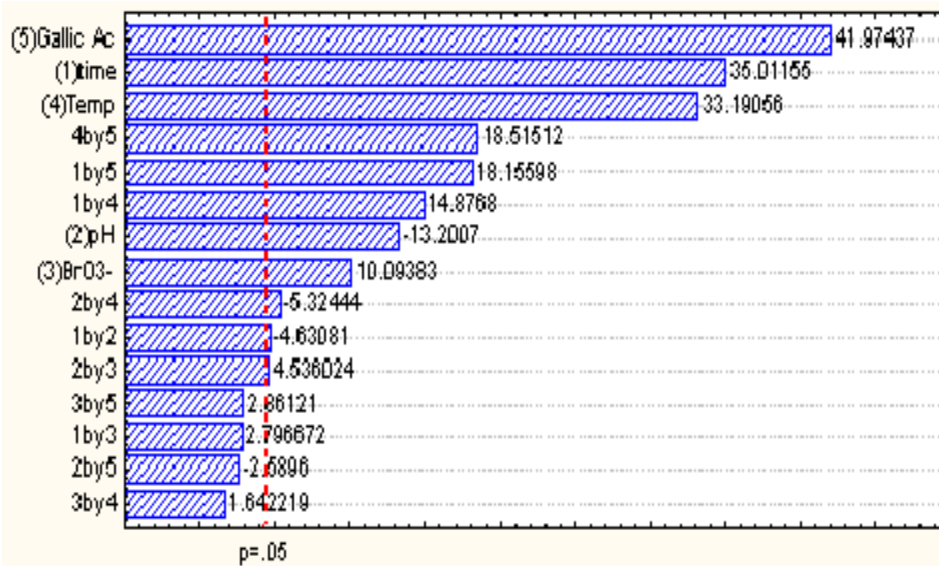

4

5

6

7

8

9

10

11

12

13

14

15 **Figure S2.**

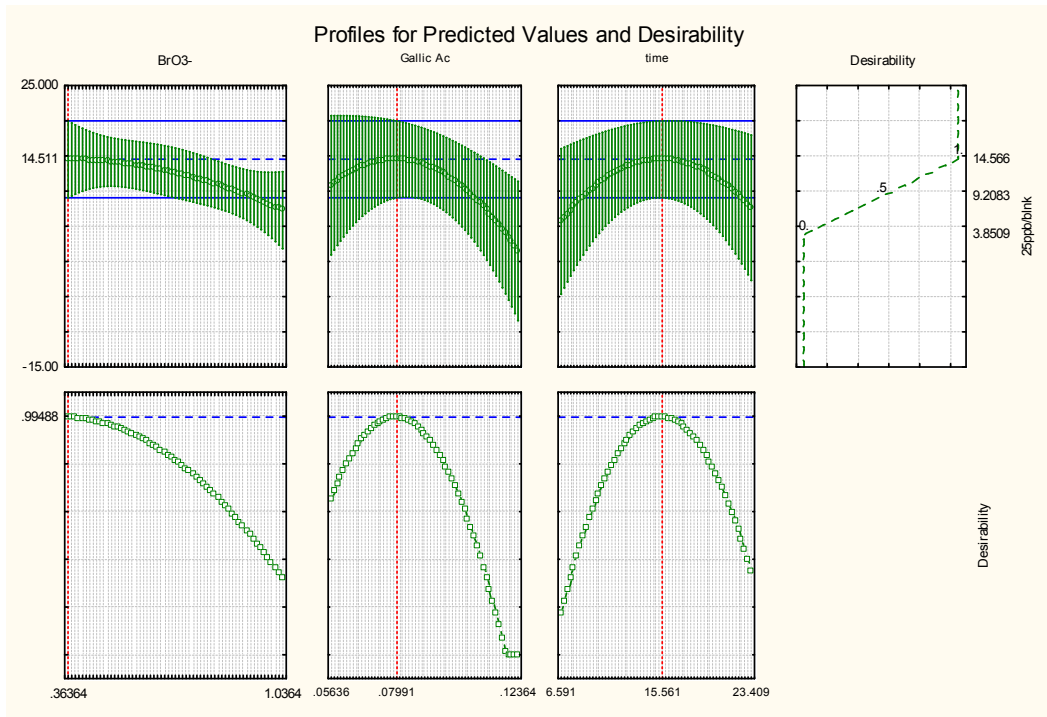

16

17 **Figure S3.**

18

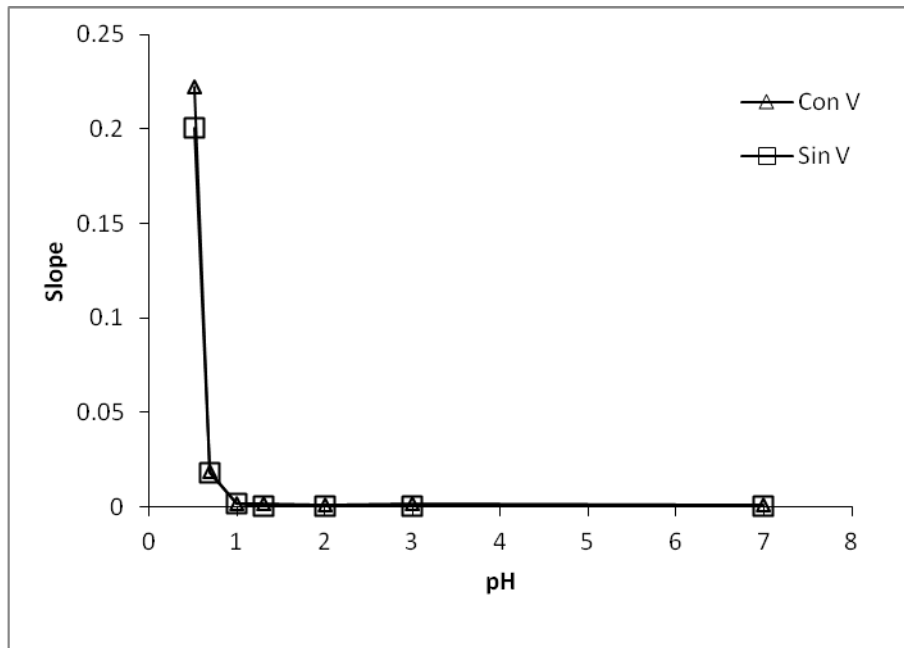

19

Supplement: c4ay01887g1.pdf [file c4ay01887g1.pdf]
